# Supplementary material for: Aldehyde dehydrogenase 2 activity and aldehydic load contribute to neuroinflammation and Alzheimer’s disease related pathology
Source: PubMed Central journal article supplement (PMC6907112; doi:10.1186/s40478-019-0839-7), 2019-12-12

# Supplementary Figure 4

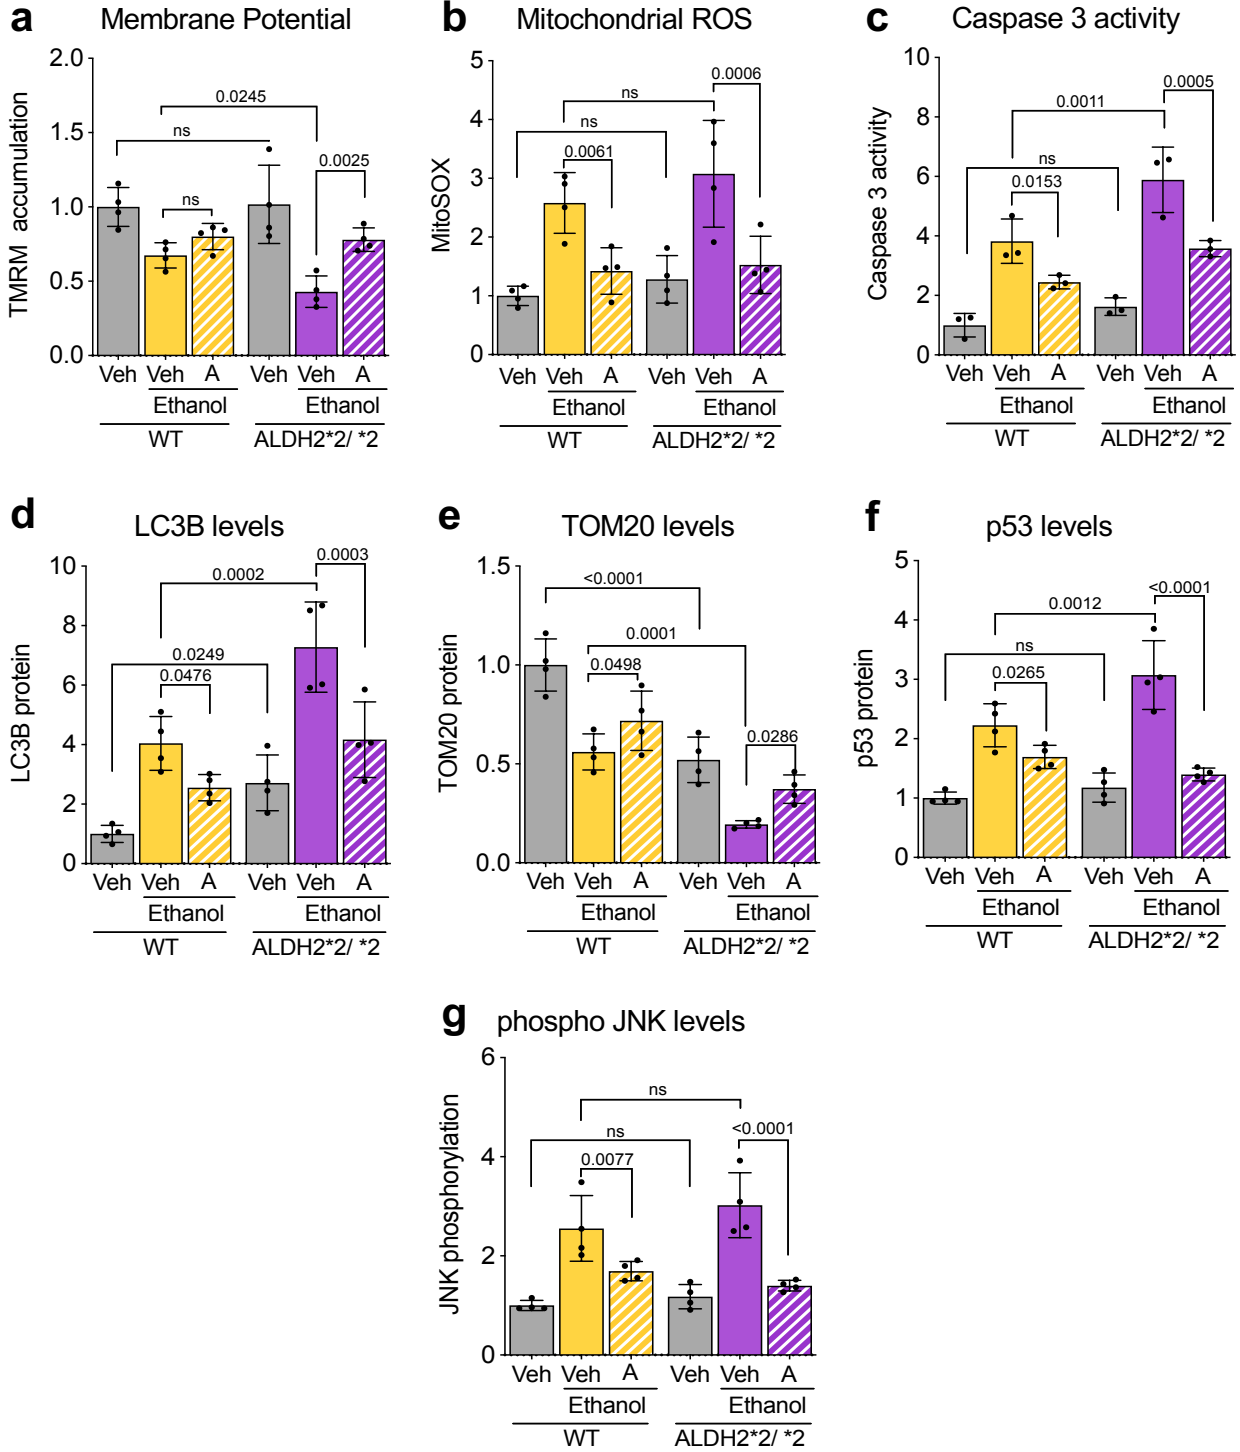

Supplement: 40478_2019_839_MOESM4_ESM.pdf [file 40478_2019_839_MOESM4_ESM.pdf]
